# Supplementary material
Source: Frontiers journal article supplement (https://www.frontiersin.org/articles/159313)
Supplement: Supplementary_Material_Breitling.PDF [file Supplementary_Material_Breitling.PDF]

*Supplementary Material*

**Improving interference control in ADHD patients with transcranial direct current stimulation (tDCS)**

**Carolin Breitling\*, Tino Zaehle, Moritz Dannhauer, Björn Bonath, Jana Tegelbeckers, Hans-Henning Flechtner, Kerstin Krauel**

**\* Correspondence:** Carolin Breitling: [carolin.breitling@med.ovgu.de](mailto:carolin.breitling@med.ovgu.de)

**Supplementary Table 1. Means, standard deviations and results of ANOVA in all sessions for sham, anodal and cathodal tDCS.**

|                           | ADHD<br>sham      | ADHD<br>anodal    | ADHD<br>cathodal  | Control<br>sham   | Control<br>anodal | Control<br>cathodal | Main effect<br>tDCS | Main effect<br>group     | Interaction<br>tDCS x group |
|---------------------------|-------------------|-------------------|-------------------|-------------------|-------------------|---------------------|---------------------|--------------------------|-----------------------------|
| Commission errors         | 12.7%<br>(9.2%)   | 10.7%<br>(7.8%)   | 11.9%<br>(8.3%)   | 8.6%<br>(8.0%)    | 8.4%<br>(7.3%)    | 7.8%<br>(7.1%)      | $F_{(2,80)} = 0.49$ | $F_{(1,40)} = 2.80$      | $F_{(2,80)} = 0.41$         |
| Omission errors           | 4.1%<br>(8.9%)    | 4.5%<br>(9.2%)    | 7.1%<br>(11.6%)   | 2.0%<br>(6.8%)    | 0.9%<br>(2.0%)    | 1.9%<br>(4.7%)      | $F_{(2,80)} = 2.29$ | $F_{(1,40)} = 2.65$      | $F_{(2,80)} = 1.61$         |
| Reaction time             | 567 ms<br>(46 ms) | 573 ms<br>(52 ms) | 560 ms<br>(46 ms) | 544 ms<br>(81 ms) | 550 ms<br>(85 ms) | 544 ms<br>(79 ms)   | $F_{(2,80)} = 0.87$ | $F_{(1,40)} = 1.23$      | $F_{(2,80)} = 0.14$         |
| Reaction time variability | 0.24<br>(0.07)    | 0.23<br>(0.06)    | 0.24<br>(0.06)    | 0.19<br>(0.05)    | 0.19<br>(0.05)    | 0.19<br>(0.05)      | $F_{(2,80)} = 0.93$ | $F_{(1,40)} = 7.75^{**}$ | $F_{(2,80)} = 0.02$         |

†  $p < 0.1$ , \*  $p < 0.05$ , \*\*  $p < 0.01$ , \*\*\*  $p < 0.001$

**Supplementary Table 2. Means, standard deviations and results of ANOVA for the first, the second and the third session.**

|                           | ADHD<br>sham      | ADHD<br>anodal    | ADHD<br>cathodal  | Control<br>sham   | Control<br>anodal | Control<br>cathodal | Main effect<br>tDCS        | Main effect<br>group     | Interaction<br>tDCS x group |
|---------------------------|-------------------|-------------------|-------------------|-------------------|-------------------|---------------------|----------------------------|--------------------------|-----------------------------|
| Commission errors         | 14.9%<br>(8.7%)   | 10.1%<br>(7.0%)   | 10.3%<br>(8.7%)   | 11.4%<br>(6.0%)   | 7.1%<br>(7.7%)    | 6.3%<br>(7.6%)      | $F_{(2,80)} = 15.71^{***}$ | $F_{(1,40)} = 2.80$      | $F_{(2,80)} = 0.13$         |
| Omission errors           | 3.6%<br>(5.5%)    | 5.7%<br>(10.3%)   | 6.3%<br>(12.8%)   | 1.6%<br>(2.7%)    | 1.4%<br>(4.7%)    | 1.9%<br>(6.6%)      | $F_{(2,80)} = 1.49$        | $F_{(1,40)} = 2.65$      | $F_{(2,80)} = 1.16$         |
| Reaction time             | 570 ms<br>(42 ms) | 562 ms<br>(50 ms) | 568 ms<br>(52 ms) | 571 ms<br>(92 ms) | 538 ms<br>(76 ms) | 528 ms<br>(69 ms)   | $F_{(2,80)} = 6.81^{**}$   | $F_{(1,40)} = 1.23$      | $F_{(2,80)} = 4.88^*$       |
| Reaction time variability | 0.24<br>(0.06)    | 0.23<br>(0.06)    | 0.24<br>(0.06)    | 0.21<br>(0.04)    | 0.18<br>(0.05)    | 0.18<br>(0.06)      | $F_{(2,80)} = 3.88^*$      | $F_{(1,40)} = 7.75^{**}$ | $F_{(2,80)} = 3.04^\dagger$ |

$^\dagger p < 0.1$ ,  $^* p < 0.05$ ,  $^{**} p < 0.01$ ,  $^{***} p < 0.001$

**Supplementary Table 3. Means, standard deviations and results of ANOVA in the first session for sham, anodal and cathodal tDCS.**

|                           | ADHD<br>sham      | ADHD<br>anodal    | ADHD<br>cathodal  | Control<br>sham   | Control<br>anodal  | Control<br>cathodal | Main effect<br>tDCS | Main effect<br>group          | Interaction<br>tDCS x group   |
|---------------------------|-------------------|-------------------|-------------------|-------------------|--------------------|---------------------|---------------------|-------------------------------|-------------------------------|
| Commission errors         | 20.57%<br>(9.19%) | 9.82%<br>(7.21%)  | 14.45%<br>(6.94%) | 12.08%<br>(7.25%) | 13.21%<br>(6.29%)  | 8.97%<br>(4.29%)    | $F_{(2,36)} = 2.11$ | $F_{(1,36)} = 2.66$           | $F_{(2,36)} = 2.71^{\dagger}$ |
| Omission errors           | 5.80%<br>(7.60%)  | 2.22%<br>(4.60%)  | 2.79%<br>(3.73%)  | 1.16%<br>(2.90%)  | 2.07%<br>(3.21%)   | 1.47%<br>(2.06%)    | $F_{(2,36)} = 0.44$ | $F_{(1,36)} = 2.26$           | $F_{(2,36)} = 0.98$           |
| Reaction time             | 585 ms<br>(38 ms) | 581 ms<br>(43 ms) | 543 ms<br>(36 ms) | 557 ms<br>(99 ms) | 579 ms<br>(107 ms) | 577 ms<br>(81 ms)   | $F_{(2,36)} = 0.26$ | $F_{(1,36)} = 0.003$          | $F_{(2,36)} = 0.64$           |
| Reaction time variability | 0.27<br>(0.07)    | 0.20<br>(0.05)    | 0.23<br>(0.05)    | 0.20<br>(0.02)    | 0.23<br>(0.03)     | 0.21<br>(0.05)      | $F_{(2,36)} = 0.52$ | $F_{(1,36)} = 3.13^{\dagger}$ | $F_{(2,36)} = 3.47^*$         |

$^{\dagger} p < 0.1$ ,  $^* p < 0.05$ ,  $^{**} p < 0.01$ ,  $^{***} p < 0.001$

**Supplementary Table 4. Commission errors in ADHD patients, separated for session number depending on tDCS condition (mean and standard deviation).**

|                        |                 |                 |               |                |                |                |
|------------------------|-----------------|-----------------|---------------|----------------|----------------|----------------|
| first session          | sham:           |                 | anodal:       |                | cathodal:      |                |
| (n = 7 per group)      | 20.57% (9.19%)  |                 | 9.82% (7.21%) |                | 14.45% (6.94%) |                |
| second session         | anodal:         | cathodal:       | sham:         | cathodal:      | sham:          | anodal:        |
| (n = 3 or 4 per group) | 10.63% (6.11%)  | 11.52% (7.06%)  | 3.28% (1.97%) | 12.84% (6.70%) | 8.44% (7.57%)  | 13.40% (8.75%) |
| third session          | cathodal:       | anodal:         | cathodal:     | sham:          | anodal:        | sham:          |
| (n = 3 or 4 per group) | 12.62% (13.07%) | 13.02% (15.75%) | 4.15% (3.22%) | 11.84% (6.54%) | 8.56% (5.46%)  | 10.68% (6.84%) |

**Supplementary Table 5. Commission errors in control group, separated for session number depending on tDCS condition (mean and standard deviation).**

|                        |                |               |                |                 |               |               |
|------------------------|----------------|---------------|----------------|-----------------|---------------|---------------|
| first session          | sham:          |               | anodal:        |                 | cathodal:     |               |
| (n = 7 per group)      | 12.08% (7.25%) |               | 13.21% (6.29%) |                 | 8.97% (4.29%) |               |
| second session         | anodal:        | cathodal:     | sham:          | cathodal:       | sham:         | anodal:       |
| (n = 3 or 4 per group) | 9.62% (11.76%) | 4.70% (2.60%) | 5.13% (2.80%)  | 10.52% (13.59%) | 5.99% (4.30%) | 5.27% (1.73%) |
| third session          | cathodal:      | anodal:       | cathodal:      | sham:           | anodal:       | sham:         |
| (n = 3 or 4 per group) | 7.46% (9.02%)  | 3.56% (1.92%) | 5.28% (2.43%)  | 11.80% (14.20)  | 4.81% (4.93%) | 3.13% (2.85%) |
